# Supplementary material
Source: Springer Nature journal article supplement (https://www.springermedizin.de/resource/supplementary/13075_2010_2889_MOESM1_ESM.pdf/9693114)

■ Baseline

■ Week 12

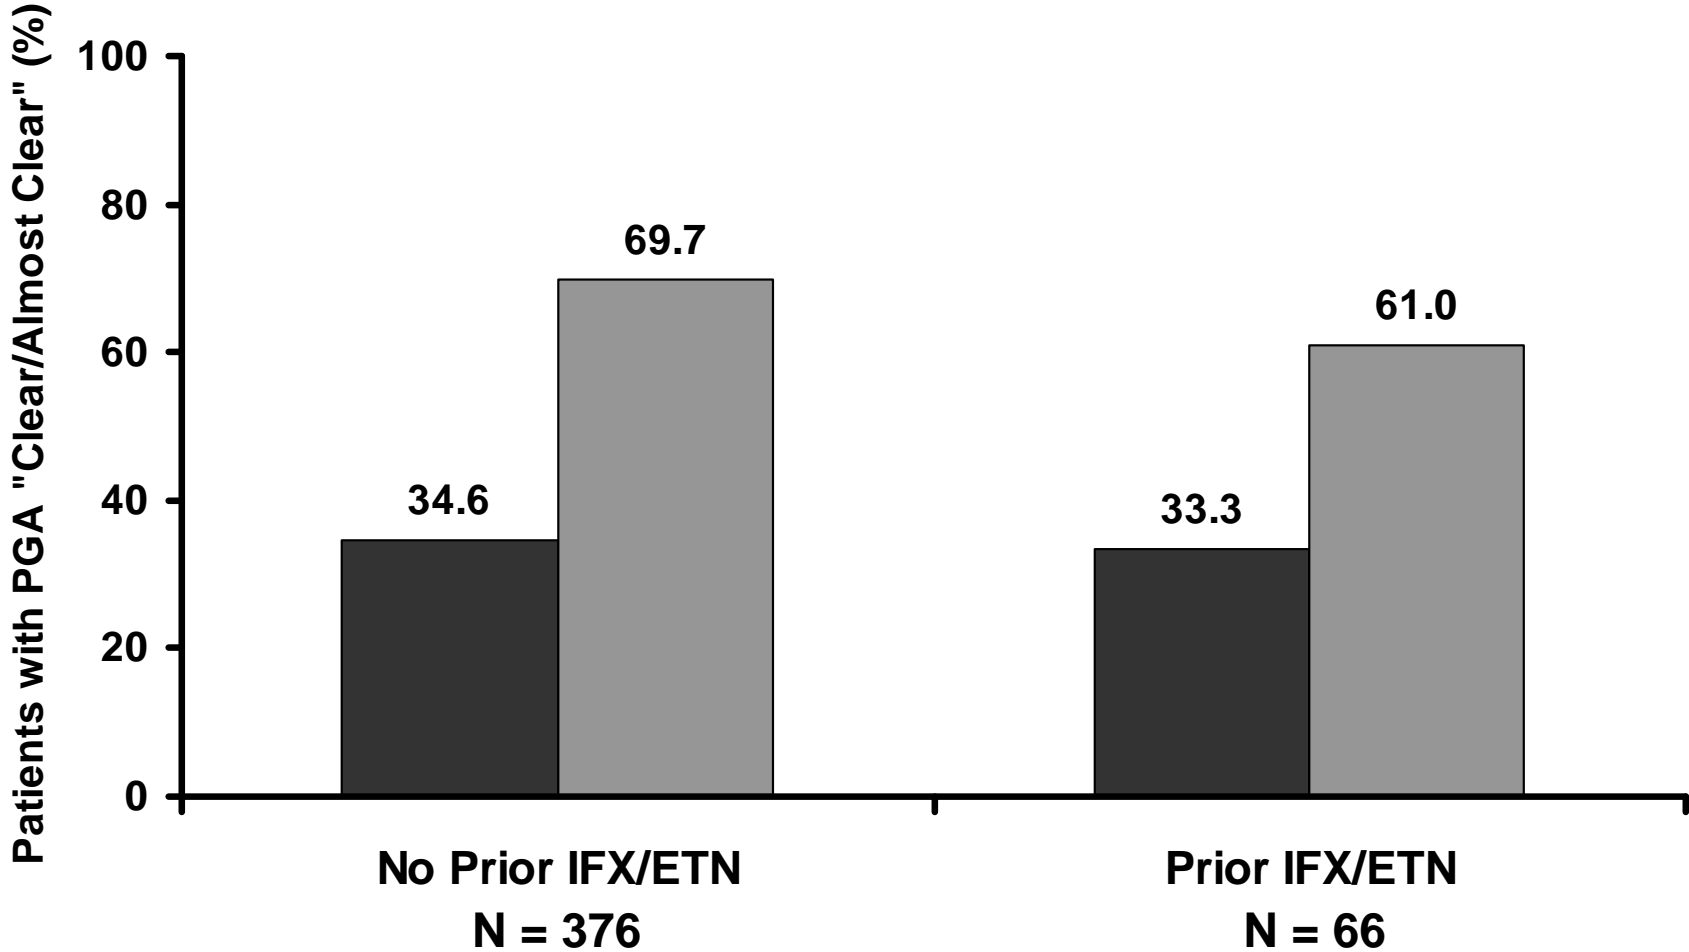

Supplement: MOESM1 [file 9693114]
